# Supplementary material for: Transcriptional analysis of the three Nlrp1 paralogs in mice
Source: PubMed Central journal article supplement (PMC3641005; doi:10.1186/1471-2164-14-188), 2013-03-18
Supplement: 1471-2164-14-188-S1.pdf [file 1471-2164-14-188-S1.pdf]

## Additional Table 1

Tissue expression of Nlrp1a and Nlrp1b in mouse organs determined by end-point PCR

| Splice variant | Nlrp1a  |          | Nlrp1b   |         |          |
|----------------|---------|----------|----------|---------|----------|
|                |         |          | SV1, SV2 | SV3     |          |
| Mouse strain   | Balb/cJ | C57BL/6J | C57BL/6J | Balb/cJ | C57BL/6J |
| Bone marrow    | -       | +        | +        | +       | +        |
| Spleen         | -       | +        | +        | +       | +        |
| Liver          | -       | +        | +        | +       | +        |
| Kidney         | -       | +        | +        | +       | +        |
| Heart          | -       | +        | +        | +       | +        |
| Lung           | -       | +        | +        | +       | +        |
| Brain          | -       | +        | +        | +       | +        |
| Stomach        | -       | IC       | +        | -       | +        |
| Muscle         | -       | +        | +        | +       | +        |
| Spinal Cord    | -       | +        | +        | +       | +        |
| Thymus         | -       | +        | +        | +       | +        |
| Adrenals       | -       | +        | +        | +       | +        |
| Uterus         | -       | IC       | -        | +       | +        |
| Ovaries        | -       | +        | +        | +       | +        |

IC, inconclusive results; +/- refers to presence of absence of PCR product.
